# Supplementary material for: Synthesis of [(MeCyt)2H]I—structure and stability of a dimeric threefold hydrogen-bonded 1-methylcytosinium 1-methylcytosine cation
Source: Royal Society of Chemistry journal article supplement (doi:10.1039/b407542k), 2004-01-01
Supplement: b407542k.doc [file b407542k.doc]

**Synthesis of [(MeCyt)2H]I – structure and stability of a dimeric threefold**

**hydrogen-bonded 1‑methylcytosinium 1-methylcytosine cation**

Thomas Krüger, Clemens Bruhn, and Dirk Steinborn*

Institut für Anorganische Chemie der Martin-Luther-Universität Halle-Wittenberg

# Supplementary data

**[(Mecyt)2H]+, equilibirum structure 5a (file: cytkat02.out/catkat02erwbs.out)**

basis set 6-31G(d) 6-31G(d,p)

*E*(RB+HF-LYP) -868.945099888 Ha -868.977361673 Ha

Zero-point vibrational energy 169.54687 kcal/mol 169.12409 kcal/mol

Sum of electronic and zero-point energies -868.674910 Ha -868.707845 Ha

Sum of electronic and thermal energies -868.657641 Ha -868.690702 Ha

Sum of electronic and thermal enthalpies -868.656697 Ha -868.689758 Ha

Sum of electronic and thermal free energies -868.720584 Ha -868.753049 Ha

*x y z*

H -1.05729800 -3.54785000 0.00004600

N -0.80309500 -2.56906000 0.00002300

C -1.75375100 -1.65316200 0.00001200

H 0.21256000 -2.31057400 0.00001700

C -3.14847500 -1.95128300 0.00002400

N -1.39362100 -0.33888600 -0.00001500

H -3.49573100 -2.97591000 0.00004400

C -4.02845300 -0.91285400 -0.00000200

C -2.27709300 0.72923200 -0.00001700

H -0.36896200 -0.06603500 -0.00001700

H -5.10009500 -1.07782900 0.00000100

N -3.63246300 0.39095800 -0.00004100

O -1.90564100 1.89296700 0.00000000

C -4.59344800 1.50728200 -0.00000700

H -4.44146800 2.12372800 -0.88799900

H -4.44224100 2.12306700 0.88858300

H -5.60261100 1.09531100 -0.00060200

O 1.82196500 -1.84737800 -0.00000500

N 1.36162000 0.39766900 0.00001100

H -0.04936400 2.47596900 0.00003900

C 2.21015000 -0.66608000 -0.00000100

N 3.59476800 -0.43188200 -0.00000800

C 4.48422100 -1.60033100 -0.00002300

C 4.07475900 0.84182700 -0.00000600

C 1.83638600 1.65461900 0.00001500

H 4.29713200 -2.20940600 0.88666000

H 4.29711200 -2.20939800 -0.88670600

H 5.51801000 -1.25241600 -0.00003300

C 3.24315400 1.91690100 0.00000700

H 5.15429300 0.94438500 -0.00001400

N 0.95298000 2.66236400 0.00002500

H 3.63460400 2.92627000 0.00000800

H 1.26742800 3.62093700 0.00003300

(Coordinates calculated with tighter convergence criteria; file: cytcat02tight.out)

**[(Mecyt)2H]+, equilibirum structure 5b (file: cytkat03.out/cytkat03erwbs.out)**

basis set 6-31G(d) 6-31G(d,p)

*E*(RB+HF-LYP) -868.945099792 Ha -868.977359395 Ha

Zero-point vibrational energy 169.54747 kcal/mol 169.12462 kcal/mol

Sum of electronic and zero-point energies -868.674909 Ha -868.707842 Ha

Sum of electronic and thermal energies -868.657640 Ha -868.690699 Ha

Sum of electronic and thermal enthalpies -868.656696 Ha -868.689755 Ha

Sum of electronic and thermal free energies -868.720578 Ha -868.753042 Ha

*x y z*

H -1.26738500 3.62092600 -0.00009900

N -0.95295900 2.66234600 -0.00013800

C -1.83638000 1.65461500 -0.00007100

H 0.04938100 2.47592500 -0.00023100

C -3.24314500 1.91691100 0.00003500

N -1.36162700 0.39765900 -0.00011100

H -3.63458500 2.92628300 0.00005300

C -4.07475900 0.84184400 0.00010300

C -2.21016600 -0.66608300 -0.00002600

H 0.36896900 -0.06602100 -0.00012400

H -5.15429200 0.94441300 0.00018200

N -3.59478300 -0.43186900 0.00007800

O -1.82199300 -1.84738400 -0.00003300

C -4.48425000 -1.60030900 0.00014600

H -4.29714600 -2.20933900 0.88685600

H -4.29716700 -2.20942400 -0.88651100

H -5.51803400 -1.25238000 0.00014100

O 1.90566400 1.89297200 -0.00004500

N 1.39362500 -0.33887900 -0.00006400

H -0.21256900 -2.31057000 -0.00019800

C 2.27710600 0.72923200 -0.00001200

N 3.63247300 0.39094900 0.00008300

C 4.59346800 1.50726600 0.00014100

C 4.02845500 -0.91286700 0.00009700

C 1.75374600 -1.65315800 -0.00007100

H 4.44190700 2.12340500 -0.88813900

H 4.44185100 2.12336100 0.88844300

H 5.60262800 1.09528700 0.00016400

C 3.14846900 -1.95128800 0.00002500

H 5.10009600 -1.07784900 0.00017200

N 0.80308600 -2.56905200 -0.00015700

H 3.49571500 -2.97591800 0.00004200

H 1.05728700 -3.54784300 -0.00016600

(Coordinates calculated with tighter convergence criteria; file: cytcat03tight.out)

**[(Mecyt)2H]+, transition state 6 (file: cytkat06.out/cytkat06erwbs.out)**

basis set 6-31G(d) 6-31G(d,p)

*E*(RB+HF-LYP) -868.937281695 Ha -868.971434825 Ha

Zero-point vibrational energy 166.80723 kcal/mol 166.49952 kcal/mol

Sum of electronic and zero-point energies -868.671457 Ha -868.706101 Ha

Sum of electronic and thermal energies -868.654577 Ha -868.689378 Ha

Sum of electronic and thermal enthalpies -868.653633 Ha -868.688434 Ha

Sum of electronic and thermal free energies -868.718004 Ha -868.750989 Ha

*x y z*

H -1.09854900 3.58339300 -0.08394600

N -0.79321300 2.62085100 -0.06825000

C -1.69512500 1.64668500 -0.04013800

H 0.21693400 2.41612100 -0.03449100

C -3.09286800 1.94614800 -0.04591100

N -1.27532800 0.35496600 -0.00714900

H -3.44070000 2.97066900 -0.07329000

C -3.96807100 0.90925800 -0.01135100

C -2.17561800 -0.68631900 0.02426400

H 0.00012100 -0.00001100 -0.00532100

H -5.04201100 1.05822800 -0.01044700

N -3.54248900 -0.38204300 0.02476100

O -1.83724600 -1.87116400 0.05201000

C -4.48074500 -1.51432100 0.06113000

H -4.31047100 -2.10730000 0.96165200

H -4.32759100 -2.15082100 -0.81244200

H -5.49771500 -1.12098900 0.06128700

O 1.83726600 1.87118700 0.05252600

N 1.27534200 -0.35493200 -0.00670800

H -0.21702000 -2.41599600 -0.03420300

C 2.17564600 0.68635200 0.02465100

N 3.54250800 0.38201300 0.02488500

C 4.48082000 1.51424600 0.06097700

C 3.96805500 -0.90928800 -0.01169300

C 1.69508800 -1.64666900 -0.03998900

H 4.32909100 2.14954200 -0.81374000

H 4.30918400 2.10847800 0.96039100

H 5.49774800 1.12080400 0.06327400

C 3.09282600 -1.94615400 -0.04617500

H 5.04199200 -1.05828100 -0.01109000

N 0.79314000 -2.62080200 -0.06765400

H 3.44063100 -2.97067700 -0.07373200

H 1.09842900 -3.58334900 -0.08397600

**[(Mecyt)H]+, equilibirum structure (file: cytkat17.out/cytkat17erwbs.out)**

basis set 6-31G(d) 6-31G(d,p)

*E*(RB+HF-LYP) -434.628982908 Ha -434.646526842 Ha

Zero-point vibrational energy 88.26828 kcal/mol 88.16144 kcal/mol

Sum of electronic and zero-point energies -434.488318 Ha -434.506033 Ha

Sum of electronic and thermal energies -434.479993 Ha -434.497813 Ha

Sum of electronic and thermal enthalpies -434.479049 Ha -434.496869 Ha

Sum of electronic and thermal free energies -434.521137 Ha -434.538646 Ha

*x y z*

H 3.57667200 -0.52894900 -0.00003600

N 2.90300500 0.22597600 -0.00001100

C 1.59656600 -0.03774600 0.00000100

H 3.27408500 1.16777900 -0.00006200

C 1.06808800 -1.34956700 0.00001400

N 0.70687400 0.98935900 0.00000900

H 1.72054700 -2.21229100 0.00000700

C -0.29376200 -1.49851800 0.00000200

C -0.69923100 0.87126300 0.00006300

H 1.01769500 1.95747100 -0.00001500

H -0.74581200 -2.48442900 -0.00001500

N -1.15650300 -0.45564200 -0.00000300

O -1.42167900 1.83481500 -0.00002000

C -2.62324400 -0.63185300 -0.00001700

H -3.04510400 -0.15895500 -0.88868900

H -3.04507600 -0.15943400 0.88892700

H -2.84370800 -1.69903200 -0.00030200

**(Mecyt), equilibirum structure (file: cytkat19.out/catkat19erwbs.out)**

basis set 6-31G(d) 6-31G(d,p)

*E*(RB+HF-LYP) -434.240525429 Ha -434.254514987 Ha

Zero-point vibrational energy 79.59364 kcal/mol 79.47650 kcal/mol

Sum of electronic and zero-point energies -434.113685 Ha -434.127861 Ha

Sum of electronic and thermal energies -434.105482 Ha -434.119746 Ha

Sum of electronic and thermal enthalpies -434.104538 Ha -434.118802 Ha

Sum of electronic and thermal free energies -434.146406 Ha -434.160423 Ha

*x y z*

H 3.53863600 0.42829600 0.23460400

N 2.88663000 -0.28707800 -0.05004100

C 1.54382000 -0.03246500 -0.00433700

H 3.15686500 -1.24647800 0.12030700

C 1.08515700 1.32702700 -0.00359600

N 0.73651300 -1.07540000 0.00311400

H 1.76425000 2.17070900 -0.01856700

C -0.26473800 1.50458300 -0.00023300

C -0.62241700 -0.90387700 -0.00148900

H -0.72036700 2.49037800 0.00023300

N -1.11480800 0.44920000 0.00078100

O -1.44509600 -1.80797700 -0.00020800

C -2.56528300 0.61482800 0.00480200

H -2.99392300 0.13595200 0.88881000

H -2.99832300 0.13622500 -0.87715000

H -2.80395100 1.68110300 0.00557800

**Cyt-Gua (Watson-Crick dimer), equil. structure 7 (file: cytguawc01.out/cytguawc02.out)**

basis set 6-31G(d) 6-31G(d,p)

*E*(RB+HF-LYP) -937.525944837 Ha -937.554908538 Ha

Zero-point vibrational energy 137.01481 kcal/mol 136.92234 kcal/mol

Sum of electronic and zero-point energies -937.307598 Ha -937.336709 Ha

Sum of electronic and thermal energies -937.291663 Ha -937.320893 Ha

Sum of electronic and thermal enthalpies -937.290718 Ha -937.319949 Ha

Sum of electronic and thermal free energies -937.352440 Ha -937.381022 Ha

*x y z*

N 4.6744 0.4974 -0.0533

C 4.9825 -0.8546 -0.0723

H 6.0079 -1.1990 -0.1050

N 3.9242 -1.6193 -0.0466

C 2.8594 -0.7335 -0.0081

C 1.4475 -0.9645 0.0277

O 0.8370 -2.0435 0.0322

N 0.7338 0.2510 0.0593

C 1.2850 1.5113 0.0570

N 0.4221 2.5500 0.1175

H -0.5916 2.4331 0.0399

H 0.8220 3.4709 0.0280

N 2.5910 1.7365 0.0182

C 3.3060 0.5930 -0.0115

H 5.3143 1.2786 -0.0647

C -2.7702 -1.2756 0.0226

C -2.9484 1.0674 -0.0361

C -4.2045 -1.4412 -0.0059

H -4.6631 -2.4221 0.0060

N -2.1987 -0.0651 0.0113

C -4.9531 -0.3111 -0.0499

N -1.9648 -2.3424 0.0630

H -2.3529 -3.2733 0.0618

H -0.9343 -2.2286 0.0605

O -2.4902 2.2136 -0.0558

N -4.3509 0.9095 -0.0655

H -4.8871 1.7665 -0.0996

H -0.2949 0.1604 0.0676

H -6.0377 -0.3174 -0.0752

**Gua, equilibrium structure (file: guanine01.out/guanine02.out)**

basis set 6-31G(d) 6-31G(d,p)

*E*(RB+HF-LYP) -542.550087170 Ha -542.565228501 Ha

Zero-point vibrational energy 73.47546 kcal/mol 73.47876 kcal/mol

Sum of electronic and zero-point energies -542.432997 Ha -542.448133 Ha

Sum of electronic and thermal energies -542.424800 Ha -542.439993 Ha

Sum of electronic and thermal enthalpies -542.423856 Ha -542.439049 Ha

Sum of electronic and thermal free energies -542.465968 Ha -542.481047 Ha

*x y z*

N -1.7296 -1.5089 -0.0048

C -2.7134 -0.5350 0.0013

H -3.7642 -0.7924 -0.0006

N -2.2270 0.6787 0.0094

C -0.8563 0.5022 0.0093

C 0.2071 1.4746 0.0037

O 0.1857 2.6922 -0.0054

N 1.4761 0.7931 -0.0026

H 2.2681 1.4213 -0.0823

C 1.6750 -0.5638 -0.0033

N 2.9813 -1.0015 -0.0712

H 3.6770 -0.4502 0.4154

H 3.0650 -1.9963 0.0975

N 0.6993 -1.4406 0.0073

C -0.5259 -0.8535 -0.0008

H -1.8514 -2.5117 -0.0142

**Cyt, equilibirum structure (file: cytosine03.out/cytosine04.out)**

basis set 6-31G(d) 6-31G(d,p)

*E*(RB+HF-LYP) -394.928011475 Ha -394.941392212 Ha

Zero-point vibrational energy 61.97249 kcal/mol 61.98806 kcal/mol

Sum of electronic and zero-point energies -394.829252 Ha -394.842608 Ha

Sum of electronic and thermal energies -394.822629 Ha -394.836059 Ha

Sum of electronic and thermal enthalpies -394.821684 Ha -394.835115 Ha

Sum of electronic and thermal free energies -394.859877 Ha -394.873160 Ha

*x y z*

N -1.2798 0.8966 0.0037

C -0.1999 1.7157 0.0019

H -0.3938 2.7838 0.0030

C 1.0522 1.1865 -0.0030

H 1.9342 1.8146 -0.0181

C 1.1309 -0.2523 -0.0040

N 2.3603 -0.8450 -0.0485

H 2.3759 -1.8440 0.1068

H 3.1821 -0.3234 0.2155

N 0.0822 -1.0527 0.0039

C -1.1878 -0.5308 -0.0001

O -2.2233 -1.1751 0.0004

H -2.2229 1.2629 0.0072
